# Supplementary material for: PIP2 mediates functional coupling and pharmacology of neuronal KCNQ channels
Source: PubMed Central journal article supplement — Proc Natl Acad Sci U S A. 2017 Oct 23;114(45):E9702–11. doi: 10.1073/pnas.1705802114 (PMC5692535; doi:10.1073/pnas.1705802114), 2017-10-23
Supplement: pnas.201705802SI.pdf [file pnas.201705802SI.pdf]

# Supporting Information

Kim et al. 10.1073/pnas.1705802114

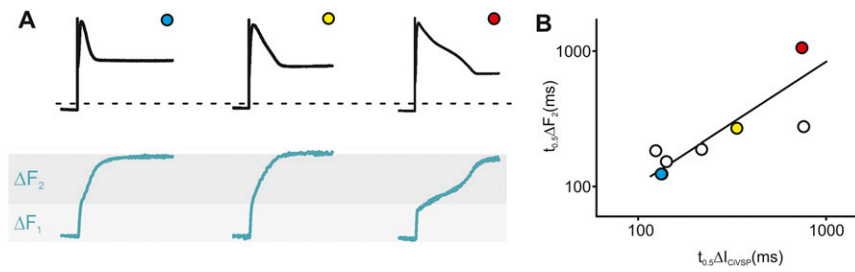

**Fig. S1.** PIP2 depletion produces a voltage-independent increase in Q3\*VCF fluorescence. (A) Exemplar current and fluorescence traces from oocytes expressing Q3\*VCF + CiVSP displaying variable kinetics of PIP2 rundown at +100 mV. (B) Time to half-maximal CiVSP-induced current rundown plotted against time to half-maximal increase in secondary fluorescence component  $\Delta F_2$  for several oocytes ( $n = 8$ ).
